# Supplementary material for: The mechanism of MOF as a heterogeneous catalyst for propene hydroformylation: a DFT study
Source: Royal Society of Chemistry journal article supplement (doi:10.1039/d1re00527h), 2022-01-01
Supplement: d1re00527h1.pdf [file d1re00527h1.pdf]

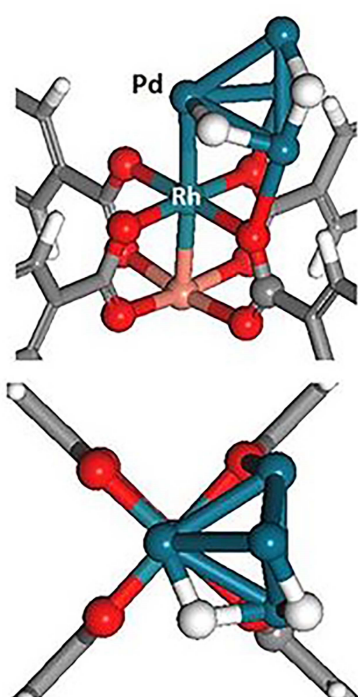

(a) Pd cluster + Rh-Cu-BTC

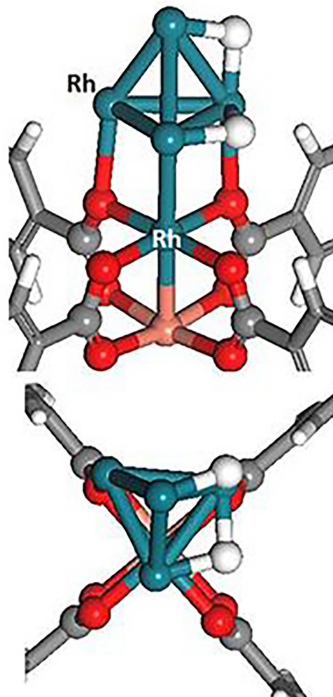

(b) Rh cluster + Rh-Cu-BTC

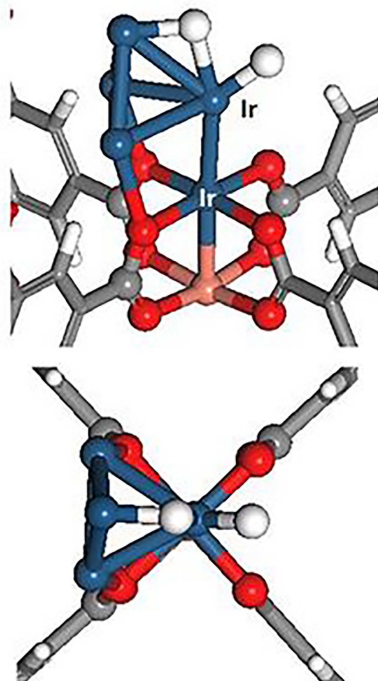

(c) Ir cluster + Ir-Cu-BTC

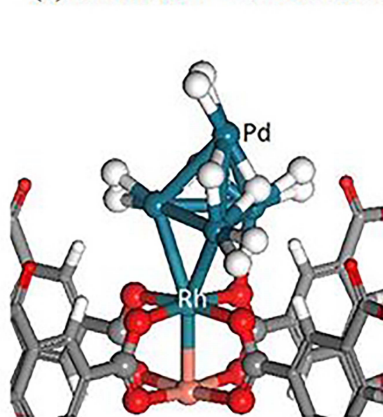

(d) initial state

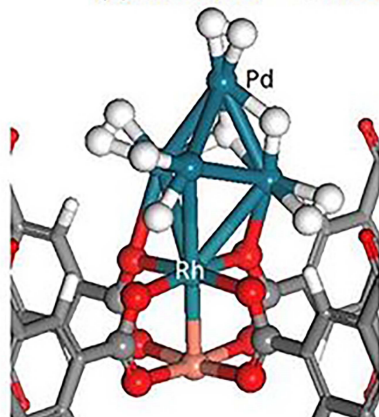

(e) transition state

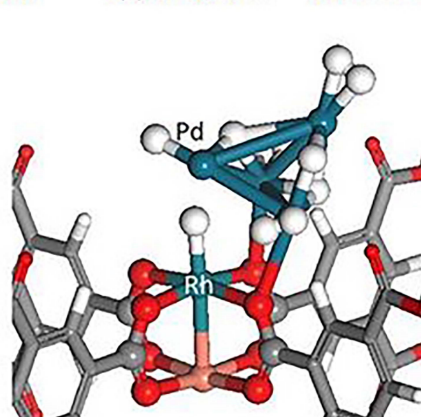

(f) final state
